# Supplementary material for: Duox-generated reactive oxygen species activate ATR/Chk1 to induce G2 arrest in Drosophila tracheoblasts
Source: eLife. 2021 Oct 8;10:e68636. doi: 10.7554/eLife.68636 (PMC8594940; doi:10.7554/eLife.68636)
Supplement: Figure 1—source data 1. [file elife-68636-fig1-data1.xlsx]

## Sheet: Sheet1
L2			0-8 h L3			16-24 h L3			32- 40 h L3			WL3
Control	Btl- SOD1	Btl-Chk1 RNAi	Control	Btl-SOD1	Btl-Chk1 RNAi	Control	Btl-SOD1	Btl-Chk1 RNAi	Control	Btl-SOD1	Btl-Chk1 RNAi	Control	Btl-SOD1	Btl-Chk1 RNAi
18	18	20	19	20	21	18	30	41	26	56	71	324	305	170
16	17	19	20	17	22	19	35	48	29	53	69	265	281	151
19	19	23	18	18	24	19	33	39	28	55	72	205	256	176
18	20	22	18	16	20	18	36	37	21	46	74	230	330	177
18	20	21	19	19	23	20	26	43	23	43	68	247	267	141
17	18	21	18	21	22	17	30	45	27	57	77	222	273	143
18	17	23	18	20	19	16	25	43	24	52	79	194	255	173
18	21		17	17	21	18	32	37	26	47	73	287	208	167
19			18	16		19	28		26	48	78		226	171
20			19	20		18			28		75		246	180
				16
				16
				20
18.1	18.75	21.2857	18.4	18.1538	21.5	18.2	30.5556	41.625	25.8	50.7778	73.6	246.75	264.7	164.9
1.1005	1.48805	1.49603	0.843274	1.90815	1.60357	1.13529	3.81153	3.88909	2.48551	4.94413	3.71782	43.6537	35.684	14.4334
				0.708557			2.0592e-08	3.98895e-12		7.8426e-11	9.71055e-18
									6.19509e-08
