# Supplementary material for: Duox-generated reactive oxygen species activate ATR/Chk1 to induce G2 arrest in Drosophila tracheoblasts
Source: eLife. 2021 Oct 8;10:e68636. doi: 10.7554/eLife.68636 (PMC8594940; doi:10.7554/eLife.68636)
Supplement: Figure 1—source data 2. [file elife-68636-fig1-data2.xlsx]

## Sheet: Sheet1
L2		0-8 h L3		16-24 h L3
Control	Btl-SOD1	Control	Btl-SOD1	Control	BtlSOD1
0	0	0	0	0	0
0	0	0	0	0	1
0	0	0	0	0	2
0	0	0	0	0	1
0	0	0	1	0	2
0	0	0	0	0	2
0	0	0	0	0	1
0	0	0	0	0	1
0	0	0	0	0	2
0	0	0	1	0	0
0	0	0	0	0	2
0	0	0	0	0	1
0	0	0	0
0	0	0	0.153846	0	1.25
0	0	0	0.375534	0	0.753778
					8.87156e-06
