# Supplementary material for: Duox-generated reactive oxygen species activate ATR/Chk1 to induce G2 arrest in Drosophila tracheoblasts
Source: eLife. 2021 Oct 8;10:e68636. doi: 10.7554/eLife.68636 (PMC8594940; doi:10.7554/eLife.68636)
Supplement: Figure 2—source data 1. [file elife-68636-fig2-data1.xlsx]

## Sheet: Sheet1
L2			0-8 h L3			16-24 h L3			32- 40 h L3			WL3
Control	Btl-DuoxRNAi 32903	Btl-Duox RNAi 33975	Control	Btl-DuoxRNAi 32903	Btl-Duox RNAi 33975	Control	Btl-DuoxRNAi 32903	Btl-Duox RNAi 33975	Control	Btl-DuoxRNAi 32903	Btl-Duox RNAi 33975	Control	Btl-DuoxRNAi 32903	Btl-Duox RNAi 33975
18	16	16	19	19	17	18	33	30	26	54	47	324	250	233
16	17	17	20	18	18	19	35	32	29	53	55	265	290	287
19	18	17	18	17	20	19	30	27	28	55	50	205	308	295
18	20	18	18	17	19	18	36	26	21	50	55	230	297	231
18	20	20	19	19	19	20	26	26	23	48	54	247	267	272
17	19	19	18	21	19	17	30	29	27	54	53	222	273	265
18	17	17	18	18	18	16	33	33	24	49	50	194	255	281
18	21	20	17	17	17	18	32	27	26	42	52	287	230	220
19			18	18	18	19	30	30	26	50	51		240	222
20			19			18			28				250
18.1	18.5	18	18.4	18.2222	18.3333	18.2	31.6667	28.8889	25.8	50.5556	51.8889	246.75	266	256.222
1.1005	1.77281	1.51186	0.843274	1.30171	1	1.13529	3.04138	2.57121	2.48551	4.06544	2.66667	43.6537	25.725	29.6849
							2.72272e-10	1.08049e-09		8.99085e-12	5.9349e-14
									6.19509e-08
