# Supplementary material for: Duox-generated reactive oxygen species activate ATR/Chk1 to induce G2 arrest in Drosophila tracheoblasts
Source: eLife. 2021 Oct 8;10:e68636. doi: 10.7554/eLife.68636 (PMC8594940; doi:10.7554/eLife.68636)
Supplement: Figure 2—source data 2. [file elife-68636-fig2-data2.xlsx]

## Sheet: Sheet1
L2			0-8 h L3			16-24 h L3
Control	Btl-DuoxRNAi (32903)	Btl-DuoxRNAi (33975)	Control	Btl-DuoxRNAi (32903)	Btl-DuoxRNAi (33975)	Control	Btl-DuoxRNAi (32903)	Btl-DuoxRNAi (33975)
0	0	0	0	0	0	0	2	1
0	0	0	0	0	1	0	1	1
0	0	0	0	0	0	0	1	2
0	0	0	0	1	0	0	2	2
0	0	0	0	0	1	0	2	2
0	0	0	0	1	0	0	1	2
0	0	0	0	0	0	0	0	2
0	0	0	0	0	0	0	2	1
0	0	0	0	0	0	0	2	2
0	0	0	0	0	0	0	2	2
		0		0	0	0	2	1
				0	0
0	0	0	0	0.166667	0.166667	0	1.54545	1.63636
0	0	0	0	0.389249	0.389249	0	0.687552	0.504525
							3.4064e-07	9.14763e-10
