# Supplementary material for: Duox-generated reactive oxygen species activate ATR/Chk1 to induce G2 arrest in Drosophila tracheoblasts
Source: eLife. 2021 Oct 8;10:e68636. doi: 10.7554/eLife.68636 (PMC8594940; doi:10.7554/eLife.68636)
Supplement: Figure 3—source data 1. [file elife-68636-fig3-data1.xlsx]

## Sheet: Sheet1
16-24 h L3
Control	Btl-Duox RNAi	Btl-Duox RNAi, Chk1	Btl-Duox RNAi, ATR	Btl-Duox RNAi, Chk1(S373D)
18	29	31	30	17
19	28	30	30	18
19	27	30	31	18
18	29	28	28	16
20	31	35	35	19
17	28	30	31	17
16	30	25	25	18
18	33	24	24	19
19	31	26	25	19
18	32	30	26	16
18.2	29.8	28.9	28.5	17.7
1.13529	1.93218	3.24722	3.50397	1.1595
	2.96532e-12			0.342794
		0.461067	0.317849	1.59134e-12
