# Supplementary material for: Duox-generated reactive oxygen species activate ATR/Chk1 to induce G2 arrest in Drosophila tracheoblasts
Source: eLife. 2021 Oct 8;10:e68636. doi: 10.7554/eLife.68636 (PMC8594940; doi:10.7554/eLife.68636)
Supplement: Figure 4—source data 1. [file elife-68636-fig4-data1.xlsx]

## Sheet: Figure 4I
Control			Btl-ATR RNAi			Btl-ATRIP RNAi			Btl-TOPBP1 RNAi			Btl-Claspin RNAi
L2	16-24 h L3		L2	16-24 h L3		L2	16-24 h L3		L2	16-24 h L3		L2	16-24 h L3
18	18		17	24		17	19		18	17		21	21
16	19		16	25		16	19		18	19		20	20
19	19		18	24		19	17		19	19		22	21
18	18		18	24		20	16		19	18		22	21
18	20		19	26		19	21		19	19		20	22
17	17		17	26		18	18		18	18		20	22
18	16		16	24		19	19		18	19		22	21
18	18		18	25		19	18		19	18		22	23
19	19		18	26			18
20	18			25
18.1	18.2		17.4444	24.9		18.375	18.3333		18.5	18.375		21.125	21.375
1.1005	1.13529		1.01379	0.875595		1.30247	1.41421		0.534522	0.744024		0.991031	0.916125
