# Supplementary figures and images for: Duox-generated reactive oxygen species activate ATR/Chk1 to induce G2 arrest in Drosophila tracheoblasts
Source: eLife journal article supplement (doi:10.7554/elife.68636), 2021-10-08

# Figure 5 - Figure Supplement 1

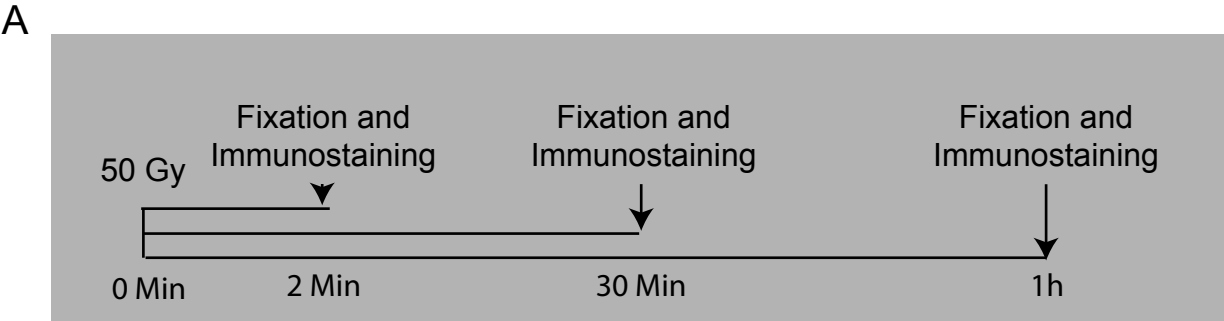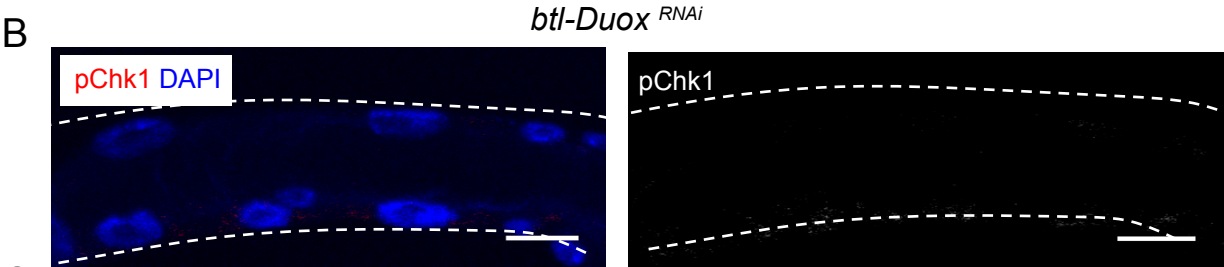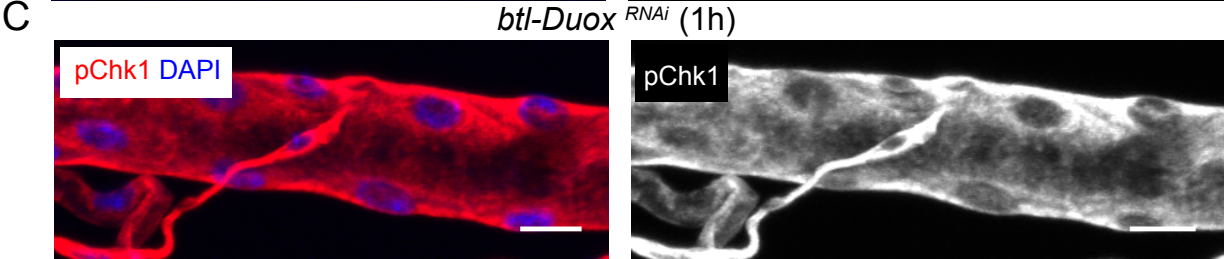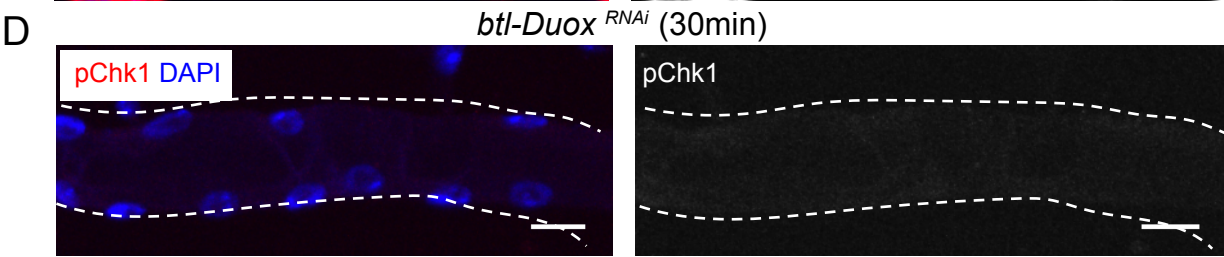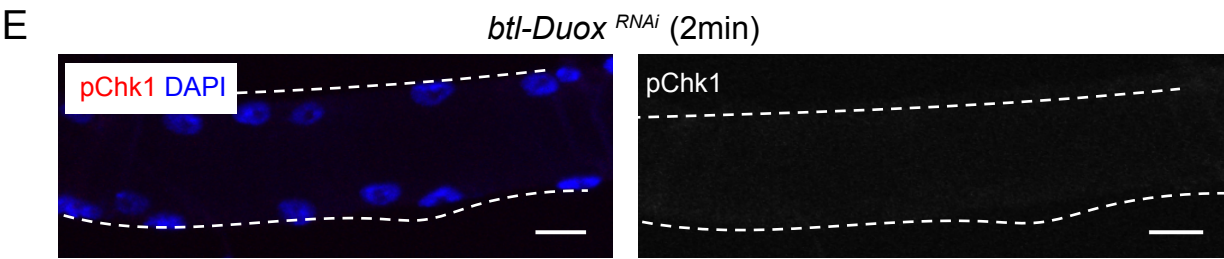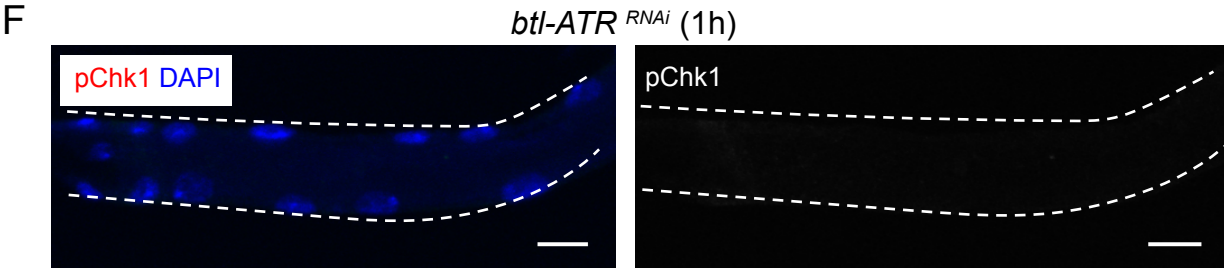

50 Gy

Supplement: supp [file elife-68636-supp-v2.zip]

## Figure 4 - Figure Supplement 2

A

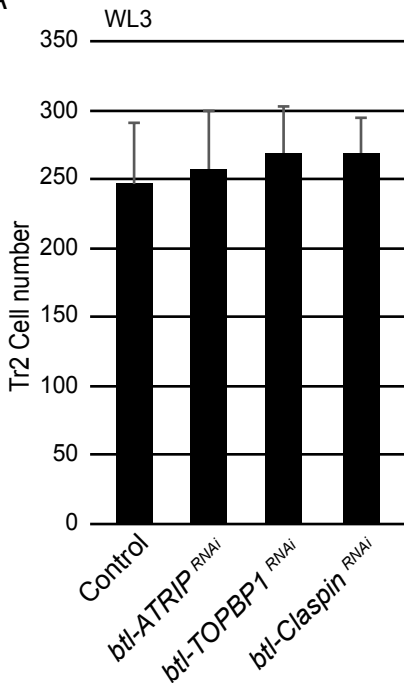

Supplement: supp [file elife-68636-supp-v2.zip]

Figure 1 - Figure Supplement 2

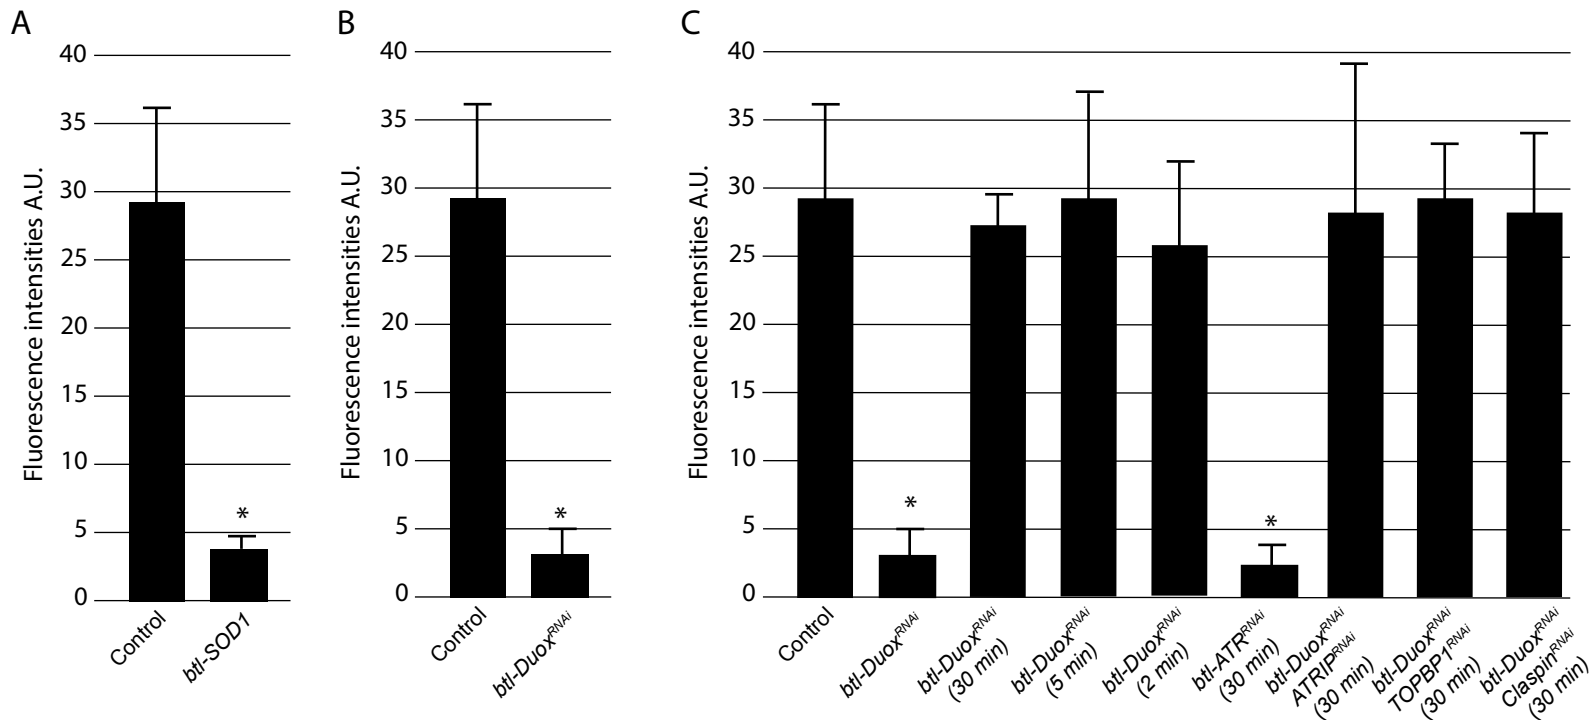

Supplement: supp [file elife-68636-supp-v2.zip]

# Figure 4 - Figure Supplement 1

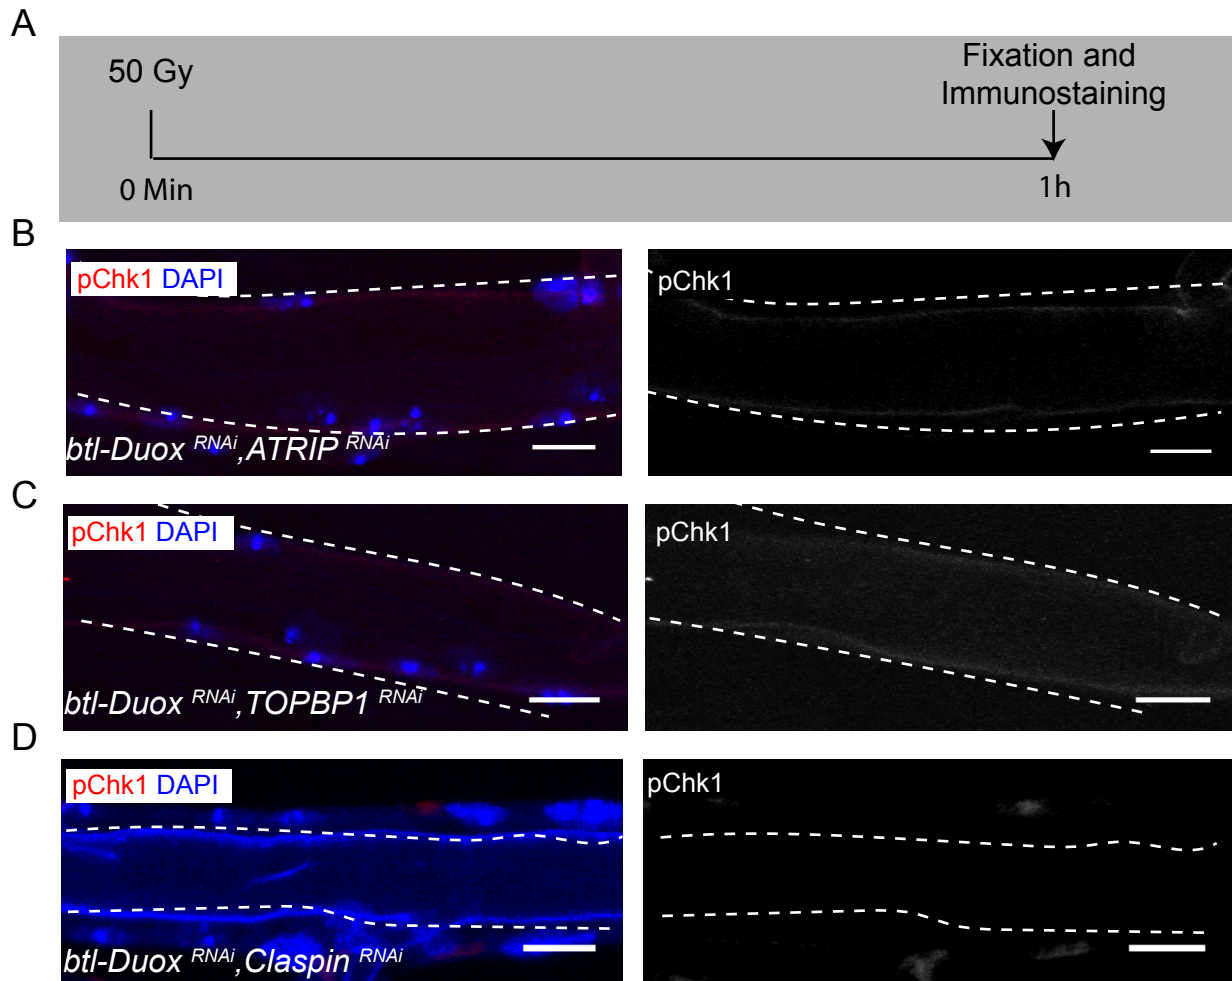

Supplement: supp [file elife-68636-supp-v2.zip]

Figure 1 - Figure Supplement 1

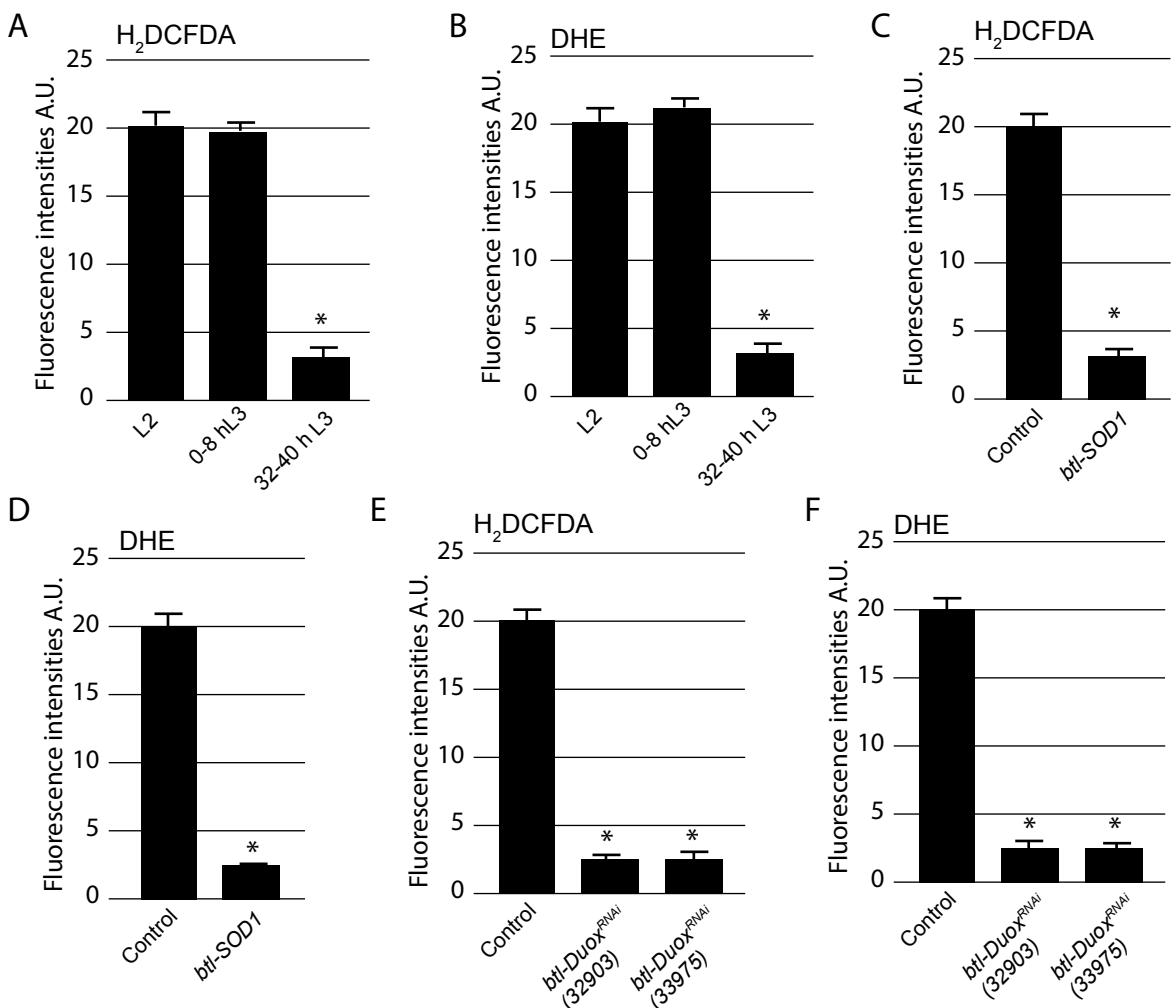

Supplement: supp [file elife-68636-supp-v2.zip]
